# Supplementary material for: Evaluation of Tanshinone IIA Developmental Toxicity in Zebrafish Embryos
Source: PubMed Central journal article supplement (PMC6154573; doi:10.3390/molecules22040660), 2017-04-21
Supplement: molecules-22-00660-s001.pdf [file molecules-22-00660-s001.pdf]

# Supplementary Materials: Evaluation of Tanshinone IIA Developmental Toxicity in Zebrafish Embryos

Table S1. Crystal data and structure refinement for (Tanshinone IIA).

|                                             |                                                   |
|---------------------------------------------|---------------------------------------------------|
| Empirical formula                           | C <sub>19</sub> H <sub>18</sub> NO <sub>3</sub>   |
| Formula weight                              | 294.33                                            |
| Temperature/K                               | 100(2)                                            |
| Crystal system                              | N/A                                               |
| Space group                                 | Pmna                                              |
| a/Å                                         | 6.646(3)                                          |
| b/Å                                         | 9.193(4)                                          |
| c/Å                                         | 24.468(10)                                        |
| α/°                                         | 90.00                                             |
| β/°                                         | 90.00                                             |
| γ/°                                         | 90.00                                             |
| Volume/Å <sup>3</sup>                       | 1494.9(11)                                        |
| Z                                           | 4                                                 |
| ρ <sub>calc</sub> /cm <sup>3</sup>          | 1.308                                             |
| μ/mm <sup>-1</sup>                          | 0.088                                             |
| F(000)                                      | 624.0                                             |
| Crystal size/mm <sup>3</sup>                | 0.21 × 0.20 × 0.19                                |
| Radiation                                   | MoKα (λ = 0.71073)                                |
| 2θ range for data collection/°              | 4.74 to 50                                        |
| Reflections collected                       | 7233                                              |
| Data/restraints/parameters                  | 1429/2/136                                        |
| Goodness-of-fit on F <sup>2</sup>           | 1.051                                             |
| Final R indexes [I>=2σ (I)]                 | R <sub>1</sub> = 0.0529, wR <sub>2</sub> = 0.1679 |
| Final R indexes [all data]                  | R <sub>1</sub> = 0.0605, wR <sub>2</sub> = 0.1753 |
| Largest diff. peak/hole / e Å <sup>-3</sup> | 0.27/-0.23                                        |

**Table S2.** Lethality (%) of dechorionated embryos exposed to Tan-IIA at 12 hpf.

|        | Solvent control | 1.0 $\mu\text{M}$ | 5.0 $\mu\text{M}$ | 10.0 $\mu\text{M}$ | 20.0 $\mu\text{M}$ | 50.0 $\mu\text{M}$ |
|--------|-----------------|-------------------|-------------------|--------------------|--------------------|--------------------|
| 12 hpf | 1.7             | 5.2               | 5.0               | 8.3                | 10.0               | 21.0               |

**Table S3.** Lethality (%) of chorionic embryos exposed to Tan-IIA at 12 hpf.

|        | Solvent control | 1.5 $\mu\text{M}$ | 3.0 $\mu\text{M}$ | 6.0 $\mu\text{M}$ | 12.0 $\mu\text{M}$ | 24.0 $\mu\text{M}$ |
|--------|-----------------|-------------------|-------------------|-------------------|--------------------|--------------------|
| 24 hpf | 0.0             | 0.0               | 3.3               | 8.3               | 10.0               | 6.7                |

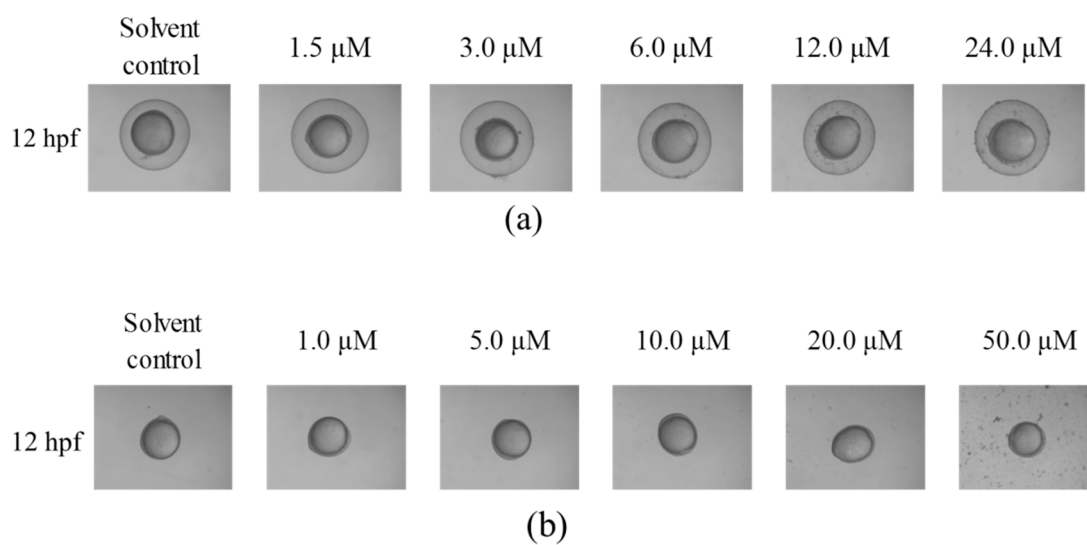

**Figure S1.** Morphology of zebrafish embryos exposed to Tan-IIA at 12 hpf. (a) Morphology of chorionic embryos; (b) Morphology of dechorionated embryos.

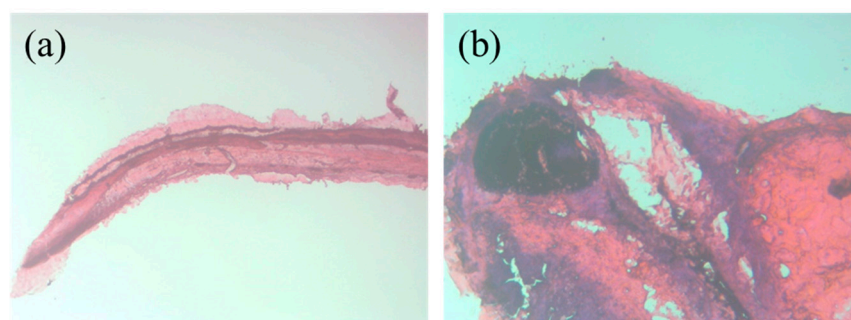

**Figure S2.** Longitudinal sections of scoliosis (a,  $\times 10$ ) and pericardial edema (b,  $\times 40$ ) with HE staining.

**Table S4.** Observations of teratogenic effects of dechorionated embryos at 48 hpf depending on concentration of Tan-IIA.

|                      | Solvent control | 1 $\mu$ M | 5 $\mu$ M | 10 $\mu$ M | 20 $\mu$ M | 50 $\mu$ M |
|----------------------|-----------------|-----------|-----------|------------|------------|------------|
| Scoliosis            |                 |           |           | +          | +          | +          |
| Tail autolysis       |                 |           |           | +          | +          | +          |
| Pericardial edema    |                 |           |           |            | +          | +          |
| Malformation of head |                 |           |           |            | +          | +          |
| Malformation of eyes |                 |           |           |            | +          | +          |
| Yolk sac edema       |                 |           |           |            | +          | +          |
| Growth retardation   |                 |           |           |            |            | +          |

**Table S5.** Observations of acute toxicity in dechorionated embryos exposed to Tan-IIA.

|                            | Exposure times |        |        |        |
|----------------------------|----------------|--------|--------|--------|
|                            | 24 hrs         | 48 hrs | 72 hrs | 96 hrs |
| Coagulated embryos         | +              | +      | +      |        |
| Lack of somite formation   | +              | +      |        |        |
| Non-detachment of the tail | +              | +      |        |        |
| Lack of heartbeat          |                | +      | +      | +      |
